# Supplementary material
Source: publisher figshare collection journal article supplement (https://asha.figshare.com/ndownloader/files/30476463)
Supplement: Supplementary file 1 [file 30476463]

## Supplemental Material S1.

**List of U.S. cities from which the consumer reviews on hearing healthcare services were extracted (Google.com)**

| City           | Region    | 2018 Population | % of population over 65 years | Median age | Median household income |
|----------------|-----------|-----------------|-------------------------------|------------|-------------------------|
| New York       | Northeast | 8,398,748       | 13.6                          | 36.6       | 60,879                  |
| Los Angeles    | West      | 3,990,456       | 11.7                          | 35.8       | 60,197                  |
| Chicago        | Midwest   | 2,705,994       | 11.7                          | 34.6       | 55,295                  |
| Houston        | Southwest | 2,325,502       | 16                            | 33.1       | 50,896                  |
| Phoenix        | West      | 1,660,272       | 10                            | 33.8       | 56,696                  |
| Philadelphia   | Northeast | 1,584,138       | 18.5                          | 34.3       | 39,759                  |
| San Antonio    | Southwest | 1,532,233       | 11.6                          | 33.6       | 50,044                  |
| San Diego      | West      | 1,425,976       | 12                            | 34.5       | \$76,662                |
| Dallas         | Southwest | 1,345,047       | 9.8                           | 32.4       | 50,627                  |
| San Jose       | West      | 1,030,119       | 11.9                          | 36.8       | 104,675                 |
| Austin         | Southwest | 964,254         | 8.4                           | 33.4       | 67,755                  |
| Jacksonville   | Southeast | 903,889         | 17.5                          | 35.8       | 51,497                  |
| Fortworth      | Southwest | 895,008         | 9.3                           | 32.9       | 60,205                  |
| Columbus       | Midwest   | 892,533         | 9.8                           | 32.2       | 51,708                  |
| San Francisco  | West      | 883,305         | 14.9                          | 38.3       | 110,816                 |
| Seattle        | West      | 744,955         | 12.1                          | 35.6       | 86,822                  |
| Denver         | West      | 716,492         | 11.2                          | 34.5       | 65, 224                 |
| Boston         | Northeast | 694,583         | 11                            | 32.3       | 66,758                  |
| Las Vegas      | West      | 644,644         | 14.1                          | 37.8       | 56,699                  |
| Sacramento     | West      | 508,529         | 12.2                          | 35.2       | 56,943                  |
| Atlanta        | Southeast | 498,044         | 22.3                          | 33.3       | 57,597                  |
| Kansas City    | Midwest   | 491,918         | 11.4                          | 33.4       | 41,671                  |
| Miami          | Southeast | 470,914         | 16.6                          | 39.8       | 40,327                  |
| Omaha          | Midwest   | 468,262         | 12.3                          | 34.5       | 56,406                  |
| Cleveland      | Midwest   | 383,793         | 13.3                          | 36.2       | 28,974                  |
| Corpus Christi | Southwest | 326,554         | 13.2                          | 35.3       | 53,605                  |
| Pittsburgh     | Midwest   | 301,048         | 11.5                          | 33.3       | 45,851                  |
| Buffalo        | Northeast | 256,304         | 12.2                          | 32.9       | 34,814                  |
| Salt Lake City | West      | 200,591         | 10.6                          | 31.9       | 54,009                  |
| Grand Rapids   | Midwest   | 200,217         | 11.5                          | 31.1       | 44,369                  |
| Amarillo       | Southwest | 199,924         | 12.7                          | 33.7       | 51,198                  |
| Little Rock    | Southeast | 197,881         | 13.2                          | 36         | 48,463                  |
| Tallahassee    | Southeast | 193,551         | 9.6                           | 26.6       | 42,428                  |

|             |           |         |      |      |         |
|-------------|-----------|---------|------|------|---------|
| Frisco      | South     | 188,170 | 7.5  | 36.5 | 120,701 |
| Knoxville   | Southeast | 187,500 | 13.2 | 32.6 | 36,331  |
| Brownsville | Southwest | 183,392 | 11.3 | 30.3 | 35,636  |
| Salem       | West      | 173,442 | 13.3 | 35.2 | 51666   |
| Jackson     | Southeast | 164,422 | 11.6 | 35.8 | 51497   |
| Orange      | West      | 139,484 | 11.7 | 35.2 | 83500   |
| Round Rock  | Southwest | 128,739 | 7.5  | 33.9 | 76295   |
